# Supplementary material
Source: PubMed Central journal article supplement (PMC7337970)

# Supplemental Figure 1

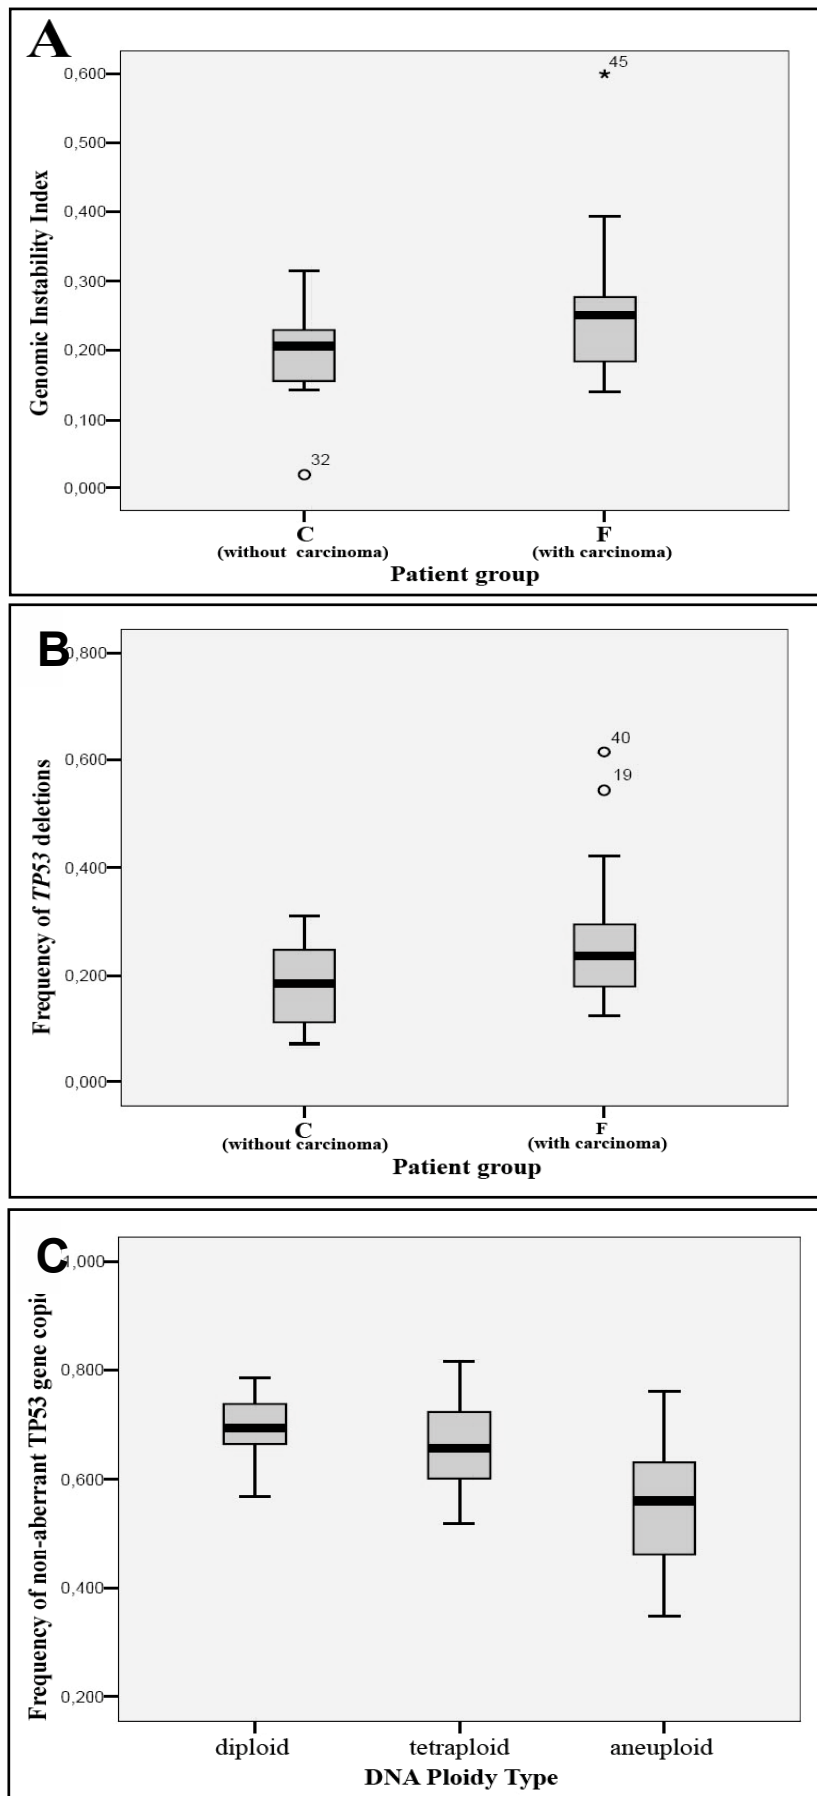

Supplement: NIHMS1596361-supplement-Supplemental_figure_1.pdf [file NIHMS1596361-supplement-Supplemental_figure_1.pdf]

## Supplemental Figure 2

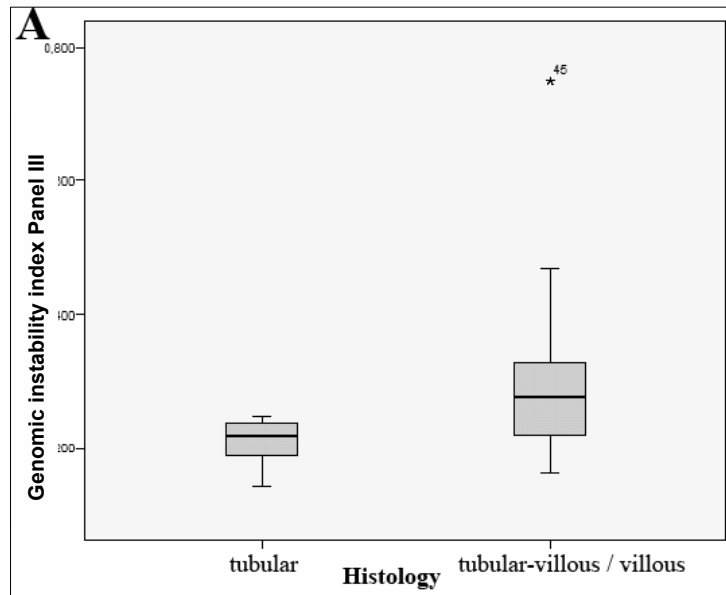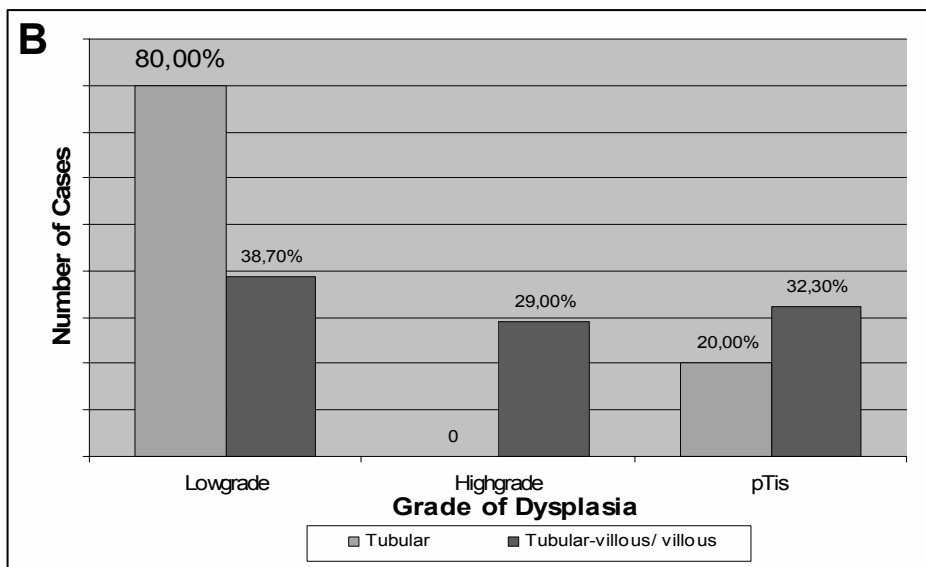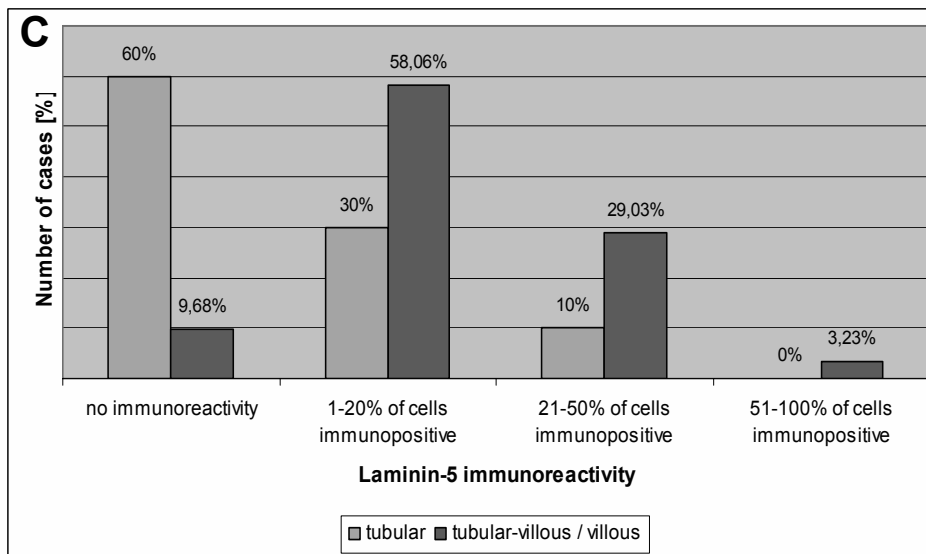

Supplement: NIHMS1596361-supplement-Supplemental_figure_2.pdf [file NIHMS1596361-supplement-Supplemental_figure_2.pdf]

### Supplemental Figure 3

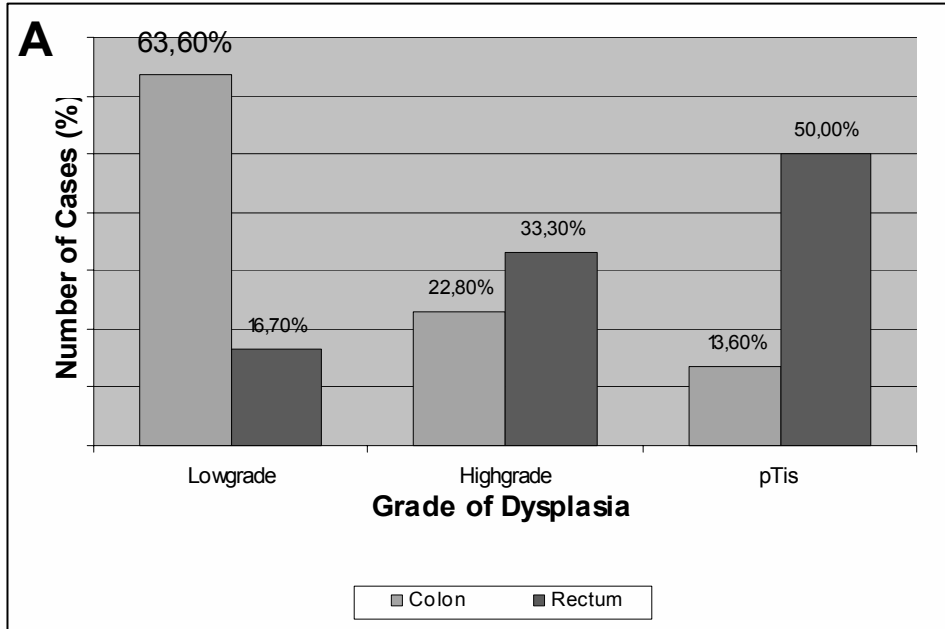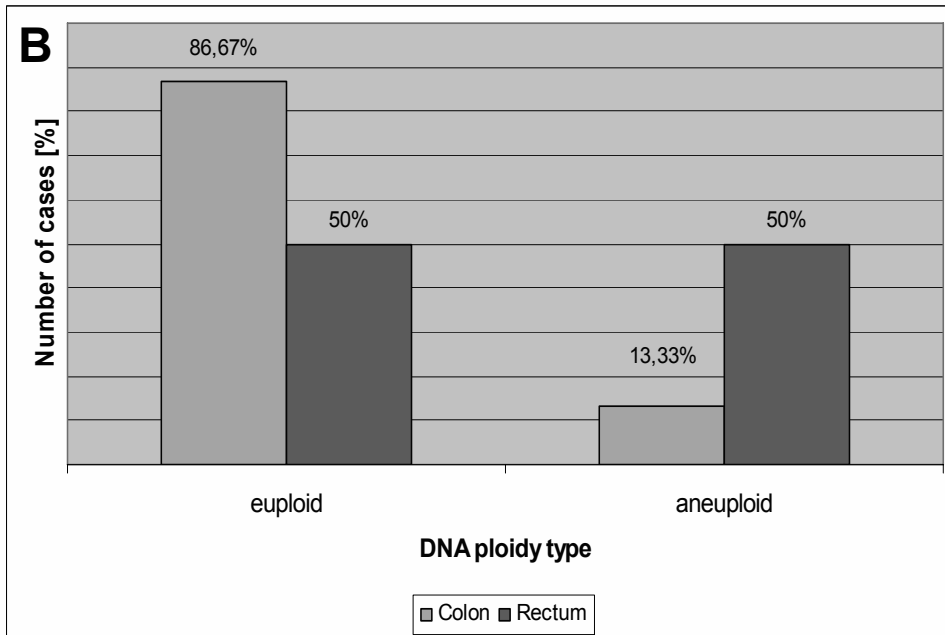

Supplement: NIHMS1596361-supplement-Supplemental_figure_3.pdf [file NIHMS1596361-supplement-Supplemental_figure_3.pdf]
